# Supplementary material for: Hyperkalemia Following Parathyroidectomy in Patients with Renal Hyperparathyroidism—New Thresholds for Urgent Perioperative Dialysis
Source: MDPI journal article supplement (doi:10.3390/jcm11020409), 2022-01-14
Supplement: s1 [file s1]

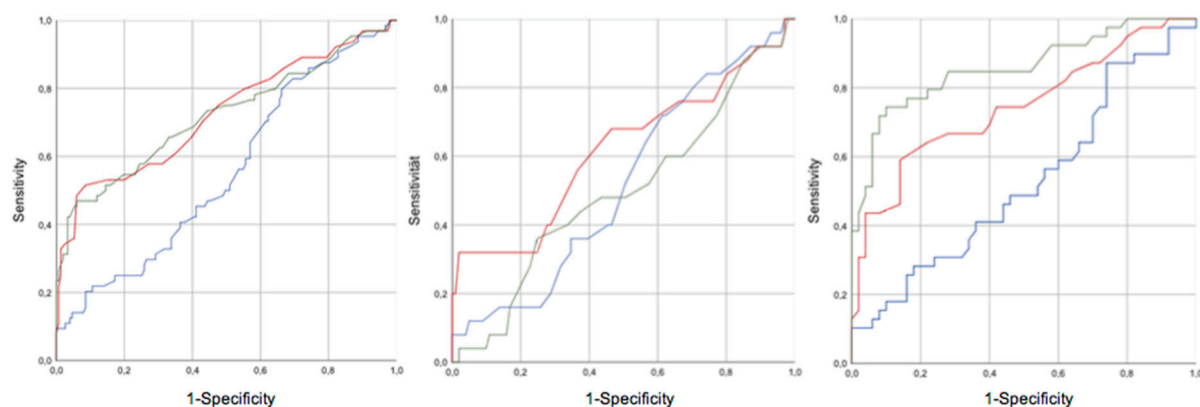

| Total (n = 251)   |             |       |        |       |       |
|-------------------|-------------|-------|--------|-------|-------|
| Times of measure  | SPL         | AUC   | Sign.  | Sens. | Spec. |
| Preoperatively    | 4.63 mmol/L | 0.555 | 0.204  | 0.797 | 0.338 |
| Intraoperatively  | 5.75 mmol/L | 0.725 | <0.001 | 0.516 | 0.914 |
| Postoperatively   | 5.83 mmol/L | 0.721 | <0.001 | 0.470 | 0.940 |
| Charité (n = 130) |             |       |        |       |       |
| Preoperatively    | 4.69 mmol/L | 0.521 | 0.748  | 0.720 | 0.386 |
| Intraoperatively  | 5.80 mmol/L | 0.618 | 0.070  | 0.320 | 0.980 |
| Postoperatively   | 5.15 mmol/L | 0.498 | 0.066  | 0.360 | 0.752 |
| Neuss (n = 121)   |             |       |        |       |       |
| Preoperatively    | 4.59 mmol/L | 0.525 | 0.682  | 0.872 | 0.260 |
| Intraoperatively  | 5.85 mmol/L | 0.745 | 0.050  | 0.590 | 0.860 |
| Postoperatively   | 5.83 mmol/L | 0.858 | 0.042  | 0.744 | 0.900 |

SPL serum potassium level, AUC area under the curve, Sign. significance, Spec. specificity

**Figure S2** ROC-analysis of serum potassium levels (SPL) and its predictivity for urgent hemodialysis (UHD) at day of surgery in total and at both centers. The left figure presents the analyses of the whole study group, the middle figure shows the analyses of patients in Berlin and the right figure in Neuss. The blue line represents preoperative SPL, the red line the intraoperative values and the green line shows postoperatively measured SPL.
