# Supplementary material for: Hyperkalemia Following Parathyroidectomy in Patients with Renal Hyperparathyroidism—New Thresholds for Urgent Perioperative Dialysis
Source: MDPI journal article supplement (doi:10.3390/jcm11020409), 2022-01-14
Supplement: s1 [file s1]

|                 |                                                                                                                                                  |
|-----------------|--------------------------------------------------------------------------------------------------------------------------------------------------|
| <b>Table S1</b> | Comparison of different serum potassium thresholds intra- and postoperative with regard for urgent hemodialysis (UHD) at the both study centers. |
|-----------------|--------------------------------------------------------------------------------------------------------------------------------------------------|

|                                         |     | Berlin<br>(n = 130) |                             |         | Neuss<br>(n = 121) |                            |         |
|-----------------------------------------|-----|---------------------|-----------------------------|---------|--------------------|----------------------------|---------|
|                                         |     | UHD<br>(n = 25)     | No<br>Dialysis<br>(n = 105) | p-value | UHD<br>(n = 42)    | No<br>Dialysis<br>(n = 79) | p-value |
| K <sup>+</sup> intraop<br>≥ 5.5 mmol/L  | yes | 8 (32%)             | 14 (13%)                    | 0.032   | 27 (64%)           | 20 (25%)                   | 0.001   |
| K <sup>+</sup> intraop<br>≥ 5.75 mmol/L | yes | 8 (32%)             | 2 (2%)                      | <0.001  | 25 (60%)           | 11(14%)                    | <0.001  |
| K <sup>+</sup> postop<br>≥ 5.5 mmol/L   | yes | 2 (8%)              | 16 (15%)                    | 0.316   | 34 (81%)           | 22 (28%)                   | <0.001  |
| K <sup>+</sup> postop<br>≥ 5.75 mmol/L  | yes | 1 (4%)              | 10 (10%)                    | 0.349   | 30 (71%)           | 8 (10%)                    | <0.001  |

Values as numbers and percentage

K<sup>+</sup> serum potassium, intraop intraoperative, postop postoperative, UHD urgent hemodialysis
