# Supplementary material for: Hyperkalemia Following Parathyroidectomy in Patients with Renal Hyperparathyroidism—New Thresholds for Urgent Perioperative Dialysis
Source: MDPI journal article supplement (doi:10.3390/jcm11020409), 2022-01-14
Supplement: s1 [file s1]

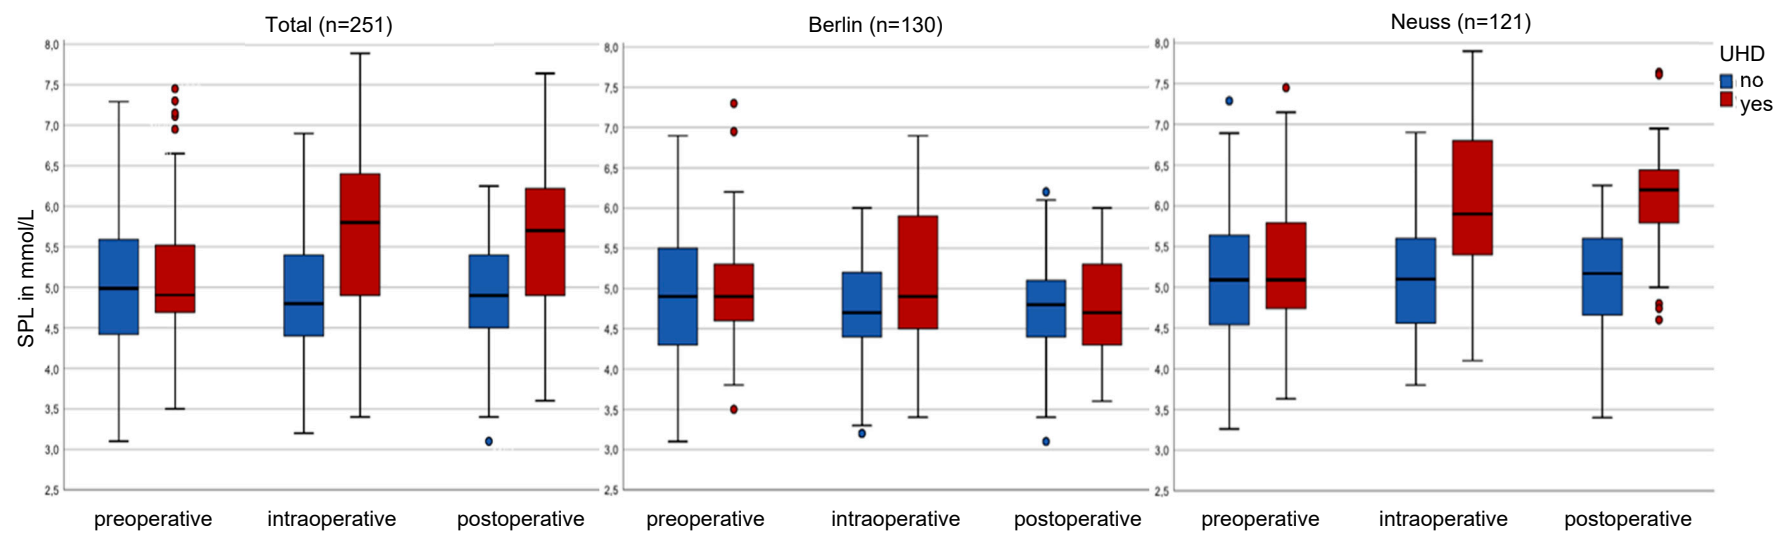

**Figure S1** Boxplots showing the distribution of SPL at the different times perioperatively with regard for the need of UHD in total and comparing the centers.
